# Supplementary material
Source: publisher figshare collection journal article supplement (https://sage.figshare.com/ndownloader/files/13569155)
Supplement: Supplementary file 1 [file 13569155]

**Supplemental Table 1.** Comparison of other data between patients with AE-CTD-IP and those with AE-IPF

|                                                                                        | <b>AE-CTD-IP</b><br>(n=15,median (range)) | <b>AE-IPF</b><br>(n=48,median (range)) | <b>p value</b> |
|----------------------------------------------------------------------------------------|-------------------------------------------|----------------------------------------|----------------|
| Period from symptom onset to AE, mo                                                    | 12 (0, 126)                               | 45 (0, 203)                            | 0.123          |
| Period from IP-diagnosis to AE, mo                                                     | 74 (0, 226)                               | 76 (0, 205)                            | 0.881          |
| Extent scores on HRCT before AE * (full score:25)                                      | 12 (4, 19)                                | 13 (7, 19)                             | 0.803          |
| Severity of emphysema on HRCT before AE *<br>none / mild / moderate / severe / unknown | 10 / 5 / 0 / 0 / 0                        | 20 / 18 / 4 / 4 / 2                    | 0.267          |
| Serum ferritin at AE, ng/mL                                                            | 257 (35, 613)                             | 247 (34, 1120)                         | 0.318          |
| Extent of honeycombing on HRCT at AE<br>none / mild / moderate / severe / unknown      | 8 / 4 / 1 / 2 / 0                         | 6 / 15 / 19 / 6 / 2                    | 0.007          |
| Administration of sivelestat sodium hydrate, + / -                                     | 3 / 12                                    | 10 / 38                                | 0.999**        |

\* HRCT findings were evaluated within 12 months before AE-IPF.

\*\* Fisher's exact probability test

Abbreviations; AE: acute exacerbation, CTD: connective tissue disease, IP: interstitial pneumonia, HRCT: high-resolution computed tomography.
